# Supplementary material for: Blood pressure and body fat % reduction is mainly related to flavanone phase II conjugates and minor extension by phenolic acid after long-term intake of orange juice
Source: Royal Society of Chemistry journal article supplement (doi:10.1039/d1fo02664j), 2021-01-01
Supplement: d1fo02664j1.pdf [file d1fo02664j1.pdf]

## SUPPLEMENTARY MATERIAL

**Blood pressure and bod fat % reduction is mainly related to flavanone phase II conjugates and minor extension by phenolic acids after long term intake of orange juice**

Layanne Nascimento Fraga<sup>1\*</sup>, Camille Perella Coutinho<sup>1\*</sup>, Adriana Campos Rozenbaum<sup>1</sup>, Eric de Castro Tobaruela<sup>1</sup>, Franco Maria Lajolo<sup>1</sup>, Neuza Mariko Aymoto Hassimotto<sup>1‡</sup>.

<sup>1</sup>Food Research Center (FoRC) and School of Pharmaceutical Sciences, University of São Paulo, 05508-000, São Paulo, Brazil

‡Corresponding author: Neuza Mariko Aymoto Hassimotto, [aymoto@usp.br](mailto:aymoto@usp.br)

\*These authors have contributed equally to this work

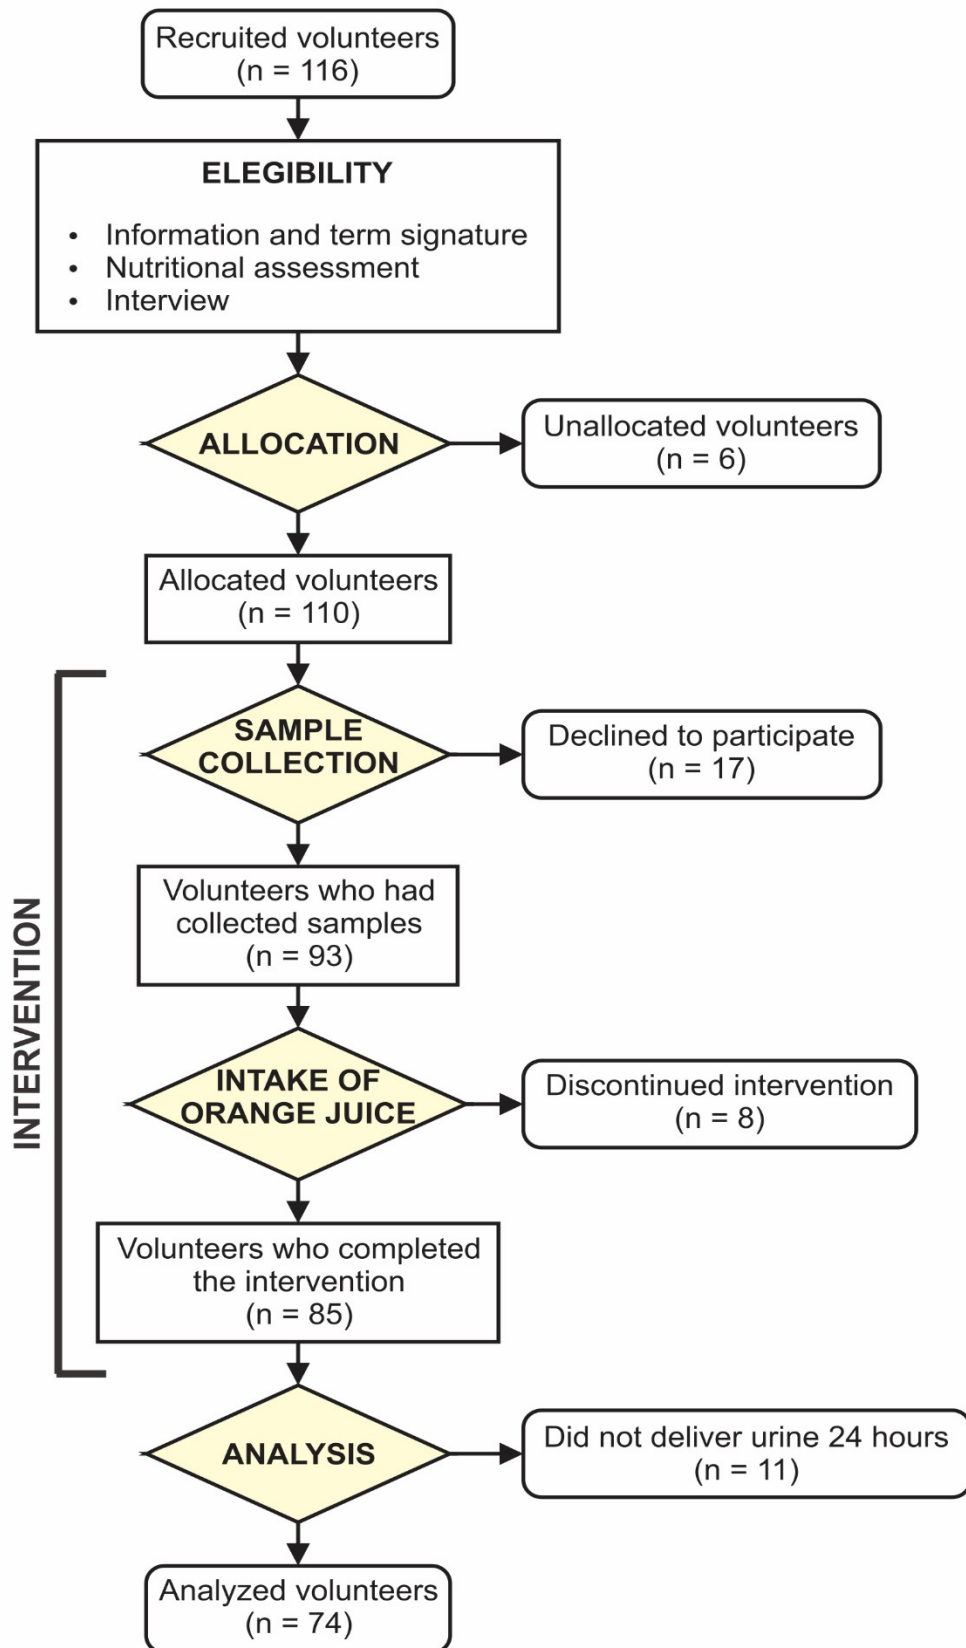

**Figure S1.** The flowchart of the clinical study.

**Table S1.** Energy and macronutrient consumption before (T0) and after 60 days (T60) of intervention with daily consumption of 500 mL of orange juice

| Variable                              | T0                                  | T60                                 | <i>p</i> -value |
|---------------------------------------|-------------------------------------|-------------------------------------|-----------------|
| Energy (kcal)                         | <b>1699.00 ± 744.65<sup>b</sup></b> | <b>1868.92 ± 854.47<sup>a</sup></b> | <b>0.0041</b>   |
| Carbohydrates (g.100g <sup>-1</sup> ) | <b>203.00 ± 11.27<sup>b</sup></b>   | <b>251.66 ± 117.16<sup>a</sup></b>  | <b>0.0001</b>   |
| Proteins (g.100g <sup>-1</sup> )      | 92.00 ± 53.75                       | 88.71 ± 57.72                       | 0.8112          |
| Lipids (g.100g <sup>-1</sup> )        | 55.00 ± 30.37                       | 55.78 ± 32.17                       | 0.5939          |
| Dietary fiber (g.100g <sup>-1</sup> ) | 12.00 ± 7.10                        | 12.38 ± 7.78                        | 0.6662          |

Results expressed as mean ± standard deviation (n = 74). *P*-value calculated using Wilcoxon Test. Values in bold letters and different superscript letters indicate statistical significance ( $p < 0.05$ ) between T0 and T60.

**Table S2.** Mass spectra data of flavanone phase II conjugates in 24-hour urine by LC-qTOF-MS/MS after the consumption of single dose (500 mL) of orange juice

| Phase II conjugates               | Peak | RT<br>(min) | [M-H] <sup>-</sup><br>(m/z) |           | MS/MS<br>(m/z)              |
|-----------------------------------|------|-------------|-----------------------------|-----------|-----------------------------|
|                                   |      |             | Theor                       | Expl      |                             |
| Hesperetin-diglucuronide isomer 1 | 1    | 8.5         | 653.1348                    | 653.1382  | 477.1073/301.0762           |
| Eriodictyol-glucuronyl-sulfate    | 2    | 10.5        | 543.0439                    | 543.0425  | 463.874/ 367.0142/ 287.0542 |
| Naringenin-glucuronyl-sulfate     | 3    | 10.5        | 527.0490                    | 527.0431  | 351.1048/271.0734           |
| Hesperetin-glucosyl-sulfate       | 4    | 11.0        | 543.0803                    | 543.0820  | 381.0270/301.0714           |
| Hesperetin diglucuronide isomer 2 | 5    | 11.2        | 653.1348                    | 653.1381  | 477.1053/301.0740           |
| Hesperetin glucuronyl-sulfate     | 6    | 11.5        | 557.0595                    | 557.0592  | 477.1056/301.0723           |
| Naringenin- glucuronide isomer 1  | 7    | 12.0        | 447.0921                    | 447.0917  | 271.0616                    |
| Naringenin 7-glucuronide*         | 8    | 14.5        | 447.0921                    | 447.0919  | 271.0602                    |
| Hesperetin glucuronide isomer     | 9    | 15.0        | 477.1027                    | 477.1056  | 301.0714                    |
| Eriodictyol sulfate isomer        | 10   | 15.2        | 367.0118                    | 367.0100  | 287.0542                    |
| Hesperetin 7-glucuronide*         | 11   | 15.9        | 477.1027                    | 477.1073  | 301.0756                    |
| Hesperetin sulfate isomer1        | 12   | 16.0        | 381.0274                    | 381.0280  | 301.0705                    |
| Hesperetin 3'-glucuronide*        | 13   | 16.5        | 477.1027                    | 477.1034  | 301.0700                    |
| Eriodictyol sulfate isomer 2      | 14   | 16.6        | 367.0118                    | 367.0110  | 287.0553                    |
| Hesperetin sulfate isomer2        | 15   | 17.5        | 381.0274                    | 381.0278  | 301.0722                    |
| RT: Retention time.               |      |             | *Compound identity          | confirmed | with standard.              |

**Table S3.** Mass spectra of phenolic acids detected in 24-hour urine by LC-qTOF-MS/MS after the consumption of single dose (500 mL) of orange juice

| Phenolic acids                                                           | Peak | RT<br>(min) | [M-H] <sup>-</sup><br>(m/z) |          | MS/MS<br>(m/z) |
|--------------------------------------------------------------------------|------|-------------|-----------------------------|----------|----------------|
|                                                                          |      |             | theor                       | expl.    |                |
| Benzene-triol isomer 1                                                   | 1    | 2.2         | 125.0233                    | 125.0217 | *              |
| (Dihydroxyphenyl) propanoic                                              | 2    | 2.6         | 181.0495                    | 181.0477 | 137.0202       |
| Benzene-triol isomer 1                                                   | 3    | 2.6         | 125.0233                    | 125.0228 | *              |
| Methoxy hydroxymandelic acid Hydroxy (hydroxy-methoxyphenyl) acetic acid | 4    | 2.8         | 197.0444                    | 197.0439 | 137.0224       |
| Dihydroxyphenylacetic acid isomer 1                                      | 5    | 3.3         | 167.0338                    | 167.0359 | *              |
| Hydroxyphenylacetic acid-sulfate isomer 1                                | 6    | 3.4         | 230.9957                    | 230.9959 | 151.0386       |
| Hydroxybenzoic acid-sulfate isomer 1                                     | 7    | 3.5         | 232.9750                    | 232.9760 | 153.0187       |
| Hydroxybenzoic acid-sulfate isomer 2                                     | 8    | 4.1         | 232.9750                    | 232.9754 | *              |
| 3,4-Dihydroxybenzoic acid                                                | 9    | 4.1         | 153.0182                    | 153.0189 | **             |
| (Hydroxyphenyl)propanoic acid-sulfate isomer 1                           | 10   | 4.1         | 261.0063                    | 261.0062 | 181.0483       |
| Hydroxybenzoic acid                                                      | 11   | 4.1         | 137.0233                    | 137.0236 | *              |
| (Hydroxyphenyl) propanoic acid-glucuronide isomer 1                      | 12   | 4.2         | 357.0816                    | 357.0812 | 181.049        |
| Benzoic acid-sulfate                                                     | 13   | 4.2         | 216.9801                    | 216.9808 | 137.0235       |
| Benzene-diol                                                             | 14   | 4.4         | 109.0284                    | 109.0281 | *              |
| Hydroxyhippuric acid isomer 1                                            | 15   | 4.4         | 194.0447                    | 194.0452 | *              |
| Hydroxyphenylacetic acid-glucuronide isomer 1                            | 16   | 4.5         | 327.0710                    | 27.0709  | 151.0403       |
| Dihydroxyphenylacetic acid isomer 2                                      | 17   | 4.6         | 167.0338                    | 167.0334 | *              |
| 3-Hydroxy (hydroxy-methoxyphenyl) propanoic acid isomer 1                | 18   | 4.7         | 211.0600                    | 211.0601 | *              |
| -Methoxycinnamic acid-glucuronide isomer 1                               | 19   | 4.8         | 369.0816                    | 369.0812 | 193.0495       |
| (Hydroxyphenyl) propanoic acid-sulfate isomer 2                          | 20   | 4.9         | 261.0063                    | 261.0050 | 181.0456       |
| Hydroxyphenylacetic acid-sulfate isomer 2                                | 21   | 5.0         | 230.9957                    | 230.9965 | 151.0387       |
| 4'-hydroxyphenylacetic acid                                              | 22   | 5.0         | 151.0389                    | 151.0365 | **             |
| Caffeic acid-glucuronide                                                 | 23   | 5.0         | 355.0660                    | 355.0649 | 179.0341       |
| Hydroxyhippuric acid isomer 2                                            | 24   | 5.0         | 194.0447                    | 194.0440 | *              |
| (Hydroxyphenyl) propanoic acid-glucuronide isomer 2                      | 25   | 5.3         | 357.0816                    | 357.0812 | *              |
| Hippuric acid-glucuronide                                                | 26   | 5.3         | 370.0757                    | 370.0746 | 194.0462       |
| (Hydroxyphenyl) propanoic acid-sulfate isomer 3                          | 27   | 5.4         | 261.0063                    | 261.0047 | 181.047        |
| Hydroxy(hydroxyphenyl)propanoic acid                                     | 28   | 5.5         | 181.0495                    | 181.0496 | 119.0492       |
| Hydroxyphenylacetic acid-sulfate isomer 3                                | 29   | 5.5         | 230.9957                    | 230.9961 | 151.0391       |
| Caffeic acid sulfate isomer 1                                            | 30   | 5.8         | 258.9907                    | 258.9917 | 179.035        |
| Methoxycinnamic acid-glucuronide isomer 2                                | 31   | 5.8         | 369.0816                    | 369.0817 | 193.0477       |
| Hydroxy (hydroxy-methoxyphenyl) propanoic acid isomer 2                  | 32   | 5.8         | 211.0600                    | 211.0602 | *              |

**Table S3. (Cont)**

| Phenolic acids                                      | Peak | RT<br>(min) | [M-H] <sup>-</sup><br>(m/z) |          | MS/MS<br>(m/z) |
|-----------------------------------------------------|------|-------------|-----------------------------|----------|----------------|
|                                                     |      |             | theor                       | expl.    |                |
| (Hydroxyphenyl) propanoic acid-glucuronide isomer 3 | 33   | 6.0         | 357.0816                    | 357.0820 | 181.0457       |
| Hydroxyphenylacetic acid-sulfate isomer 4           | 34   | 6.0         | 230.9957                    | 230.9963 | 151.0379       |
| (Hydroxyphenyl) propanoic acid-sulfate isomer 4     | 35   | 6.1         | 261.0063                    | 261.0052 | 181.047        |
| Caffeic acid-sulfate isomer 2                       | 36   | 6.2         | 258.9907                    | 258.9911 | *              |
| Hydroxyphenylacetic acid-glucuronide isomer 2       | 37   | 6.2         | 327.0710                    | 327.0742 | 151.0401       |
| (Hydroxyphenyl) propanoic acid-glucuronide isomer 4 | 38   | 6.4         | 357.0816                    | 357.0819 | 181.0497       |
| (Methoxyphenyl)propanoic acid-sulfate isomer 1      | 39   | 6.5         | 275.0220                    | 275.0211 | 195.0648       |
| Coumaric acid-sulfate isomer 1                      | 40   | 6.7         | 242.9958                    | 242.9983 | 163.0358       |
| Hydroxycinnamic acid                                | 41   | 6.7         | 163.0390                    | 163.0394 | *              |
| Hippuric acid                                       | 42   | 6.7         | 178.0498                    | 178.0495 | 77.0387**      |
| (Methoxyphenyl)propanoic acid-glucuronide isomer 1  | 43   | 6.8         | 371.0973                    | 371.0967 | 195.0688       |
| Caffeic acid-sulfate isomer 3                       | 44   | 6.8         | 258.9907                    | 258.9935 | 179.0359       |
| Hydroxy-methoxycinnamic acid isomer 1               | 45   | 7.0         | 193.0495                    | 193.0499 | 134.037        |
| (Hydroxyphenyl) propanoic acid-glucuronide isomer 5 | 46   | 7.0         | 357.0816                    | 357.0834 | 181.0512       |
| -Methoxycinnamic acid-sulfate 1                     | 47   | 7.1         | 273.0063                    | 273.0063 | 193.0497       |
| (Hydroxyphenyl)propanoic acid isomer 1              | 48   | 7.1         | 165.0546                    | 165.0534 | *              |
| (Phenyl)propionic acid sulfate isomer 1             | 49   | 7.1         | 245.0114                    | 245.0130 | 165.0562       |
| Hydroxyphenylacetic acid-glucuronide isomer 3       | 50   | 7.2         | 327.0710                    | 327.0742 | 151.041        |
| Hydroxyphenylacetic acid-sulfate isomer 5           | 51   | 7.2         | 230.9957                    | 230.9984 | 151.0395       |
| (Phenyl)propanoic acid-glucuronide isomer 1         | 52   | 7.3         | 341.0867                    | 341.0866 | 165.0561       |
| (Methoxyphenyl)propanoic acid-sulfate isomer 2      | 53   | 7.4         | 275.0220                    | 275.0218 | 195.0661       |
| Methoxycinnamic acid-glucuronide isomer 3           | 54   | 7.5         | 369.0816                    | 369.0838 | 193.0482       |
| Coumaric acid sulfate isomer 2                      | 55   | 7.6         | 242.9958                    | 242.9963 | 163.0397       |
| (Hydroxyphenyl) propanoic acid-glucuronide isomer 6 | 56   | 7.7         | 357.0816                    | 357.0841 | 181.0509       |
| 3'-hydroxyphenylacetic acid                         | 57   | 7.7         | 151.0389                    | 151.0392 | **             |
| Methoxycinnamic acid-glucuronide isomer 4           | 58   | 7.8         | 369.0816                    | 369.0816 | 193.0492       |
| -Methoxycinnamic acid-sulfate 2                     | 59   | 7.9         | 273.0063                    | 273.0078 | 193.0486       |
| (Methoxyphenyl)propanoic acid-glucuronide isomer 2  | 60   | 7.9         | 371.0973                    | 371.0967 | 195.0645       |
| (Phenyl)propanoic acid-glucuronide isomer 2         | 61   | 8.0         | 341.0867                    | 341.0869 | 165.0544       |
| (Methoxyphenyl)propanoic acid-sulfate isomer 3      | 62   | 8.1         | 275.0220                    | 275.0233 | 195.00684      |
| (Methoxyphenyl)propanoic acid-glucuronide isomer 3  | 63   | 8.8         | 371.0973                    | 371.0962 | 195.0644       |

**Table S3. (Cont)**

| Phenolic acids                                          | Peak | RT<br>(min) | [M-H] <sup>-</sup><br>(m/z) |          | MS/MS<br>(m/z) |
|---------------------------------------------------------|------|-------------|-----------------------------|----------|----------------|
|                                                         |      |             | theor                       | expl.    |                |
| (Hydroxyphenyl)propanoic acid isomer 2                  | 64   | 8.9         | 165.0546                    | 165.0549 | *              |
| (Phenyl)propionic acid sulfate isomer 2                 | 65   | 9.0         | 245.0114                    | 245.0111 | 165.055        |
| -Methoxycinnamic acid-sulfate 3                         | 66   | 9.2         | 273.0063                    | 273.0075 | 193.0494       |
| Coumaric acid-glucuronide isomer 1                      | 67   | 9.5         | 339.0710                    | 339.0725 | 163.0368       |
| (Phenyl)propanoic acid-glucuronide isomer 3             | 68   | 9.5         | 341.0867                    | 341.0876 | 165.0599       |
| Hydroxyhippuric acid isomer 3                           | 69   | 9.5         | 194.0447                    | 194.0447 | *              |
| (Methoxyphenyl)propanoic acid-glucuronide isomer 4      | 70   | 9.8         | 371.0973                    | 371.0993 | 195.0674       |
| Hydroxy (hydroxy-methoxyphenyl) propanoic acid isomer 3 | 71   | 11.3        | 211.0600                    | 211.0601 | *              |
| 3-(4'-hydroxyphenyl)propanoic acid                      | 72   | 10.0        | 165.0546                    | 165.0561 | **             |
| Phenylpropanoic acid                                    | 73   | 10.6        | 149.0597                    | 149.0594 | *              |
| Methoxycinnamic acid-glucuronide isomer 5               | 74   | 11.5        | 369.0816                    | 369.0812 | 193.0499       |
| (Hydroxyphenyl)propanoic acid isomer 3                  | 75   | 11.5        | 165.0546                    | 165.0530 | *              |
| Coumaric acid-glucuronide isomer 2                      | 76   | 11.7        | 339.0710                    | 339.0731 | 163.0408       |
| (Methoxyphenyl)propanoic acid-sulfate isomer 4          | 77   | 12.0        | 275.0220                    | 275.0237 | 195.0597       |
| Hydroxy-methoxycinnamic acid isomer 2                   | 78   | 15.4        | 193.0495                    | 193.0496 | *              |

RT: Retention time. \*No fragmentation. \*\*Compound identity confirmed with standard.

**Table S4.** Ratio between total excretion of phenolic acids and phase II conjugates (Acids/Phase II)

| Low ratio    |       | Intermediate ratio |       | High ratio   |       |
|--------------|-------|--------------------|-------|--------------|-------|
| Volunteer ID | ratio | Volunteer ID       | ratio | Volunteer ID | ratio |
| 81           | 0.04  | 82                 | 3.08  | 98           | 9.96  |
| 55           | 0.06  | 11                 | 3.22  | 47           | 9.70  |
| 66           | 0.14  | 107                | 3.23  | 19           | 10.23 |
| 31           | 0.25  | 38                 | 3.48  | 76           | 10.25 |
| 52           | 0.62  | 41                 | 3.49  | 16           | 10.38 |
| 78           | 0.71  | 113                | 3.98  | 69           | 10.75 |
| 50           | 1.24  | 22                 | 4.00  | 62           | 11.13 |
| 27           | 1.26  | 110                | 4.22  | 97           | 13.00 |
| 53           | 1.27  | 64                 | 4.38  | 95           | 13.15 |
| 14           | 1.45  | 106                | 4.41  | 54           | 13.72 |
| 61           | 1.46  | 23                 | 4.82  | 75           | 17.27 |
| 79           | 1.54  | 17                 | 4.83  | 88           | 17.86 |
| 51           | 1.55  | 40                 | 4.85  | 85           | 21.06 |
| 1            | 1.70  | 37                 | 4.85  | 80           | 21.37 |
| 13           | 1.72  | 116                | 5.02  | 91           | 21.54 |
| 111          | 1.73  | 90                 | 5.09  | 39           | 25.36 |
| 72           | 1.96  | 102                | 5.18  | 96           | 29.05 |
| 15           | 2.17  | 73                 | 5.36  | 109          | 32.01 |
| 63           | 2.56  | 46                 | 5.42  | 93           | 36.08 |
| 3            | 2.70  | 5                  | 5.83  | 84           | 90.41 |



|     |      |     |      |
|-----|------|-----|------|
| 83  | 2.73 | 36  | 5.88 |
| 28  | 2.83 | 21  | 5.89 |
| 114 | 2.83 | 105 | 6.04 |
|     |      | 65  | 6.15 |
|     |      | 20  | 6.65 |
|     |      | 86  | 7.08 |
|     |      | 57  | 7.17 |
|     |      | 30  | 7.29 |
|     |      | 18  | 7.97 |
|     |      | 99  | 8.11 |
|     |      | 10  | 8.71 |

Total N = 74 subjects. **Table S5.** Anthropometric variables and biochemical parameters of the volunteers, according to sex, before (T0) and after 30 (T30) and 60 days (T60) of orange juice consumption

|                                    | Men                              |                                  |                                  |                   | Women                            |                                   |                                  |                |
|------------------------------------|----------------------------------|----------------------------------|----------------------------------|-------------------|----------------------------------|-----------------------------------|----------------------------------|----------------|
|                                    | T0                               | T30                              | T60                              | <i>p-value</i>    | T0                               | T30                               | T60                              | <i>p-value</i> |
| Weight (kg)                        | 73.04 ± 11.10                    | 72.83 ± 7.69                     | 73.42 ± 11.15                    | 0.1753            | 61.12 ± 7.81                     | 65.36 ± 5.85                      | 61.37 ± 7.61                     | 0.2021         |
| Body fat (%)                       | 20.15 ± 5.60                     | 21.41 ± 4.20                     | 19.44 ± 5.51                     | 0.2339            | 31.98 ± 5.94                     | 29.29 ± 9.58                      | 31.21 ± 6.41                     | 0.0500         |
| SBP (mmHg)                         | 122.45 ± 9.13                    | 120.20 ± 11.71                   | 120.60 ± 9.87                    | 0.5359            | 111.93 ± 11.20                   | 111.00 ± 10.26                    | 108.60 ± 10.88                   | 0.0613         |
| DBP (mmHg)                         | 70.07 ± 7.09                     | 69.31 ± 5.51                     | 68.56 ± 7.41                     | 0.1744            | 67.95 ± 6.87                     | 67.80 ± 7.02                      | 66.03 ± 6.40                     | 0.1740         |
| Glucose (mg.dL <sup>-1</sup> )     | 92.07 ± 5.31                     | 91.22 ± 4.29                     | 92.75 ± 5.93                     | 0.4608            | 89.39 ± 6.36                     | 91.43 ± 6.40                      | 91.01 ± 5.09                     | 0.0500         |
| Insulin (mU.L <sup>-1</sup> )      | 10.96 ± 3.92                     | *                                | 12.44 ± 5.50                     | 0.0549            | 10.49 ± 3.57                     | *                                 | 11.48 ± 4.03                     | 0.0527         |
| HOMA-IR                            | 2.48 ± 0.88                      | *                                | 2.68 ± 0.90                      | 0.0689            | 2.31 ± 0.79                      | *                                 | 2.41 ± 0.48                      | 0.0566         |
| Cholesterol (mg.dL <sup>-1</sup> ) |                                  |                                  |                                  |                   |                                  |                                   |                                  |                |
| LDL                                | 90.60 ± 31.86                    | 90.65 ± 26.27                    | 90.11 ± 31.64                    | 0.5857            | 83.61 ± 25.28                    | 83.48 ± 21.25                     | 80.00 ± 22.15                    | 0.1077         |
| HDL                                | <b>52.21 ± 11.33<sup>a</sup></b> | <b>51.71 ± 7.09<sup>ab</sup></b> | <b>48.81 ± 12.24<sup>b</sup></b> | <b>&lt;0.0001</b> | <b>67.02 ± 15.61<sup>a</sup></b> | <b>64.76 ± 17.62<sup>ab</sup></b> | <b>60.63 ± 15.35<sup>b</sup></b> | <b>0.0106</b>  |

|                                      |                |                |                |        |                |                |                |        |
|--------------------------------------|----------------|----------------|----------------|--------|----------------|----------------|----------------|--------|
| Total                                | 160.56 ± 32.08 | 159.52 ± 30.02 | 157.90 ± 33.19 | 0.2206 | 167.79 ± 30.15 | 165.20 ± 21.82 | 165.30 ± 27.16 | 0.3188 |
| Triglycerides (mg.dL <sup>-1</sup> ) | 89.87 ± 46.21  | 87.33 ± 36.82  | 87.97 ± 41.99  | 0.8920 | 86.13 ± 38.67  | 85.95 ± 19.75  | 78.42 ± 39.35  | 0.2916 |
| AST (U.L <sup>-1</sup> )             | 22.59 ± 11.18  | 19.13 ± 8.41   | 19.74 ± 7.30   | 0.0897 | 15.93 ± 5.29   | 15.77 ± 3.69   | 15.34 ± 4.71   | 0.1122 |
| ALT (U.L <sup>-1</sup> )             | 23.62 ± 13.27  | 19.39 ± 7.19   | 19.61 ± 8.33   | 0.1182 | 13.74 ± 6.92   | 13.56 ± 4.30   | 13.07 ± 7.01   | 0.0548 |
| Creatinine (mg.dL <sup>-1</sup> )    | 0.94 ± 0.10    | 0.96 ± 0.10    | 0.95 ± 0.12    | 0.8190 | 0.73 ± 0.09    | 0.73 ± 0.08    | 0.76 ± 0.11    | 0.0569 |

AST: Aspartate transaminase. ALT: Alanine transaminase. LDL: Low-density lipoprotein. HDL: High-density lipoprotein. HOMA-IR: Homeostatic model assessment-Insulin resistance. SBP: Systolic Blood Pressure. DBP: Diastolic Blood Pressure. *P*-value calculated using Friedman Test. Values in bold letters and different superscript letters indicate statistical significance ( $p < 0.05$ ) among T0, T30, and T60 to each sex (mean ± standard deviation). \*Insulin was not evaluated at T30.

**Table S6.** Anthropometric variables and biochemical parameters of the volunteers, according to BMI classification, before (T0) and after 30 (T30) and 60 days (T60) of orange juice consumption

|                                      | Eutrophic                        |                                   |                                  |                   | Overweight     |                |                |                |
|--------------------------------------|----------------------------------|-----------------------------------|----------------------------------|-------------------|----------------|----------------|----------------|----------------|
|                                      | T0                               | T30                               | T60                              | <i>p-value</i>    | T0             | T30            | T60            | <i>p-value</i> |
| Weight (kg)                          | 63.07 ± 8.25                     | 65.09 ± 8.29                      | 63.42 ± 8.63                     | 0.2941            | 75.41 ± 10.35  | 70.66 ± 7.58   | 75.31 ± 9.44   | 0.9693         |
| Body fat (%)                         | 24.82 ± 8.32                     | 24.56 ± 6.63                      | 24.09 ± 7.79                     | 0.6060            | 29.67 ± 8.40   | 26.77 ± 7.01   | 29.00 ± 9.01   | 0.3831         |
| SBP (mmHg)                           | 115.98 ± 11.93                   | 112.80 ± 15.58                    | 112.60 ± 12.62                   | 0.0500            | 119.90 ± 9.00  | 117.01 ± 15.11 | 117.00 ± 11.00 | 0.5674         |
| DBP (mmHg)                           | 68.58 ± 7.28                     | 68.42 ± 7.45                      | 66.42 ± 6.41                     | 0.1022            | 69.95 ± 5.71   | 67.66 ± 6.47   | 68.86 ± 8.23   | 0.2405         |
| Glucose (mg.dL <sup>-1</sup> )       | 89.90 ± 5.88                     | 90.96 ± 4.68                      | 91.53 ± 5.61                     | 0.8028            | 91.59 ± 5.96   | 90.88 ± 6.56   | 93.76 ± 6.41   | 0.0652         |
| Insulin (mU.L <sup>-1</sup> )        | 10.53 ± 3.91                     | *                                 | 11.27 ± 3.37                     | 0.4330            | 11.12 ± 3.17   | *              | 11.78 ± 3.76   | 0.4120         |
| HOMA-IR                              | 2.33 ± 0.85                      | *                                 | 2.65 ± 1.09                      | 0.0650            | 2.51 ± 0.75    | *              | 2.86 ± 1.15    | 0.1799         |
| Cholesterol (mg.dL <sup>-1</sup> )   |                                  |                                   |                                  |                   |                |                |                |                |
| LDL                                  | 84.92 ± 28.82                    | 87.20 ± 28.80                     | 88.15 ± 26.14                    | 0.1922            | 96.68 ± 30.32  | 93.91 ± 10.29  | 93.05 ± 29.43  | 0.7014         |
| HDL                                  | <b>61.65 ± 15.92<sup>a</sup></b> | <b>58.28 ± 20.86<sup>ab</sup></b> | <b>55.42 ± 15.52<sup>b</sup></b> | <b>&lt;0.0001</b> | 54.81 ± 13.33  | 53.50 ± 16.25  | 53.52 ± 14.09  | 0.0518         |
| Total                                | 161.87 ± 31.15                   | 160.40 ± 26.73                    | 159.50 ± 30.89                   | 0.1583            | 171.27 ± 30.71 | 169.06 ± 24.69 | 168.00 ± 28.20 | 0.5396         |
| Triglycerides (mg.dL <sup>-1</sup> ) | 83.95 ± 39.46                    | 83.25 ± 37.91                     | 79.60 ± 39.52                    | 0.7303            | 99.36 ± 48.47  | 95.56 ± 33.38  | 91.81 ± 43.16  | 0.5562         |
| AST (U.L <sup>-1</sup> )             | 17.54 ± 5.75                     | 17.03 ± 4.40                      | 17.45 ± 6.69                     | 0.3612            | 19.80 ± 9.20   | 17.05 ± 5.67   | 16.30 ± 4.04   | 0.0595         |
| ALT (U.L <sup>-1</sup> )             | 16.86 ± 9.90                     | 16.09 ± 7.48                      | 16.15 ± 9.35                     | 0.0683            | 22.30 ± 11.67  | 18.00 ± 6.49   | 17.56 ± 8.13   | 0.0591         |
| Creatinine (mg.dL <sup>-1</sup> )    | 0.83 ± 0.14                      | 0.84 ± 0.12                       | 0.85 ± 0.15                      | 0.2739            | 0.86 ± 0.15    | 0.87 ± 0.14    | 0.87 ± 0.14    | 0.2613         |

AST: Aspartate transaminase. ALT: Alanine transaminase. LDL: Low-density lipoprotein. HDL: High-density lipoprotein. HOMA-IR: Homeostatic model assessment-Insulin resistance. SBP: Systolic Blood Pressure. DBP: Diastolic Blood Pressure. *P*-value calculated using Friedman Test. Values in bold letters and different superscript letters indicate statistical significance ( $p < 0.05$ ) among T0, T30, and T60 to each BMI class (mean ± standard deviation). \*Insulin was not evaluated at T30.
